# Supplementary material for: Association between oral microbiome diversity and hypertension in the US population
Source: Research Square preprint supplement (doi:10.21203/rs.3.rs-7481563/v1), 2025-09-01
Supplement: Supplementary file 1 [file 025213fd2e24b6f520cbdf38.docx]

Table S1. Subgroup analysis and interaction test for the association of oral microbiome diversity and hypertension

| **Subgroups** | **ObservedASVs** | **Faith’sphylogeneticdiversity** | **Shannon-Weinerindex** | **InverseSimpsonindex** |
| --- | --- | --- | --- | --- |
|  | OR (95% CI) P-value | OR (95% CI) P-value | OR (95% CI) P-value | OR (95% CI) P-value |
| Age(y) |  |  |  |  |
| <50 | 0.894 (0.800, 1.000) 0.04963 | 0.865 (0.772, 0.969) 0.01217 | 0.962 (0.866, 1.068) 0.46316 | 1.029 (0.930, 1.139) 0.57909 |
| ≥50 | 0.913 (0.818, 1.019) 0.10265 | 0.924 (0.825, 1.034) 0.16633 | 0.944 (0.848, 1.051) 0.29108 | 0.965 (0.867, 1.073) 0.50682 |
| P for interaction | 0.723 | 0.373 | 0.865 | 0.413 |
| Sex |  |  |  |  |
| Male | 0.930 (0.840, 1.030) 0.16323 | 0.917 (0.826, 1.018) 0.10505 | 0.949 (0.858, 1.050) 0.31274 | 0.990 (0.893, 1.097) 0.84357 |
| Female | 0.889 (0.787, 1.005) 0.05945 | 0.883 (0.782, 0.998) 0.04633 | 0.968 (0.867, 1.082) 0.56834 | 1.010 (0.912, 1.118) 0.84874 |
| P for interaction | 0.566 | 0.658 | 0.807 | 0.792 |
| Smoking status |  |  |  |  |
| Never | 0.886 (0.793, 0.990) 0.03280 | 0.875 (0.781, 0.981) 0.02182 | 0.978 (0.884, 1.081) 0.65920 | 1.012 (0.925, 1.108) 0.79355 |
| Current | 0.945 (0.809, 1.104) 0.47310 | 0.989 (0.850, 1.151) 0.88712 | 0.967 (0.820, 1.140) 0.68853 | 1.023 (0.855, 1.223) 0.80509 |
| Former | 0.891 (0.760, 1.044) 0.15358 | 0.828 (0.704, 0.974) 0.02245 | 0.881 (0.753, 1.030) 0.11111 | 0.940 (0.796, 1.110) 0.46610 |
| P for interaction | 0.797 | 0.401 | 0.536 | 0.717 |
| Alcohol intake |  |  |  |  |
| Never | 0.845 (0.748, 0.954) 0.00663 | 0.828 (0.730, 0.940) 0.00351 | 0.913 (0.816, 1.022) 0.11392 | 0.975 (0.877, 1.085) 0.64704 |
| Current | 0.975 (0.864, 1.099) 0.67499 | 0.945 (0.840, 1.065) 0.35351 | 0.988 (0.875, 1.117) 0.85271 | 1.034 (0.915, 1.169) 0.59168 |
| Former | 0.892 (0.733, 1.087) 0.25738 | 0.938 (0.770, 1.143) 0.52522 | 0.996 (0.835, 1.188) 0.96136 | 1.010 (0.856, 1.191) 0.91033 |
| P for interaction | 0.255 | 0.289 | 0.557 | 0.763 |
| Body mass index |  |  |  |  |
| <25 | 0.919 (0.772, 1.095) 0.34535 | 0.905 (0.754, 1.086) 0.28221 | 0.945 (0.798, 1.119) 0.51190 | 0.999 (0.840, 1.189) 0.99339 |
| 25-30 | 0.814 (0.713, 0.928) 0.00219 | 0.817 (0.713, 0.936) 0.00352 | 0.864 (0.763, 0.978) 0.02134 | 0.945 (0.836, 1.069) 0.36747 |
| >30 | 0.985 (0.876, 1.108) 0.80512 | 0.966 (0.857, 1.090) 0.57653 | 1.027 (0.918, 1.149) 0.64338 | 1.026 (0.926, 1.138) 0.61954 |
| P for interaction | 0.106 | 0.193 | 0.129 | 0.592 |
| Hyperlipidemia |  |  |  |  |
| No | 0.931 (0.793, 1.094) 0.38612 | 0.901 (0.757, 1.073) 0.24362 | 0.982 (0.835, 1.154) 0.82377 | 1.029 (0.867, 1.221) 0.74446 |
| Yes | 0.899 (0.822, 0.982) 0.01868 | 0.894 (0.818, 0.978) 0.01385 | 0.954 (0.877, 1.037) 0.26657 | 1.001 (0.924, 1.083) 0.98538 |
| P for interaction | 0.704 | 0.608 | 0.754 | 0.773 |
| Diabetes mellitus |  |  |  |  |
| No | 0.935 (0.858, 1.018) 0.12159 | 0.933 (0.855, 1.017) 0.11482 | 0.968 (0.892, 1.049) 0.42511 | 1.009 (0.934, 1.091) 0.81670 |
| Yes | 0.772 (0.637, 0.936) 0.00834 | 0.737 (0.607, 0.895) 0.00204 | 0.874 (0.720, 1.061) 0.17286 | 0.923 (0.750, 1.136) 0.44980 |
| P for interaction | 0.096 | 0.516 | 0.375 | 0.433 |
| Cardiovascular disease |  |  |  |  |
| No | 0.909 (0.839, 0.985) 0.01978 | 0.898 (0.827, 0.975) 0.01022 | 0.968 (0.897, 1.045) 0.41042 | 1.017 (0.944, 1.094) 0.66293 |
| Yes | 0.905 (0.638, 1.285) 0.57700 | 0.879 (0.635, 1.215) 0.43504 | 0.818 (0.564, 1.186) 0.28894 | 0.760 (0.486, 1.189) 0.22930 |
| P for interaction | 0.941 | 0.912 | 0.417 | 0.378 |
| Periodontitis |  |  |  |  |
| No | 0.901 (0.788, 1.031) 0.12970 | 0.901 (0.793, 1.023) 0.10644 | 0.997 (0.887, 1.120) 0.95839 | 1.065 (0.959, 1.182) 0.23886 |
| Yes | 0.914 (0.830, 1.005) 0.06462 | 0.900 (0.813, 0.997) 0.04404 | 0.932 (0.845, 1.028) 0.15675 | 0.940 (0.846, 1.044) 0.24956 |
| P for interaction | 0.861 | 0.992 | 0.322 | 0.098 |

All results shown are based on the fully adjusted model (Adjust II).

Table S2. Characteristics of study participants in the sensitivity analysis after excluding those with missing data

| **Variables** | **All** | **Hypertension** | | ***P*-value** |
| --- | --- | --- | --- | --- |
| **No** | **Yes** |
| N | 4414 | 2649 | 1765 |  |
| Age(y) | 48.35 ± 11.18 | 45.13 ± 10.48 | 53.17 ± 10.44 | <0.001 |
| Observed ASVs | 132.38 ± 43.09 | 133.99 ± 43.01 | 129.96 ± 43.12 | 0.002 |
| Faith’s phylogenetic diversity | 14.94 ± 3.62 | 15.10 ± 3.65 | 14.71 ± 3.56 | <0.001 |
| Shannon-Weiner index | 4.64 ± 0.67 | 4.65 ± 0.68 | 4.63 ± 0.66 | 0.299 |
| Inverse Simpson index | 0.90 ± 0.06 | 0.90 ± 0.06 | 0.90 ± 0.06 | 0.272 |
| Sex |  |  |  | 0.003 |
| Male | 2272 (51.47%) | 1316 (49.68%) | 956 (54.16%) |  |
| Female | 2142 (48.53%) | 1333 (50.32%) | 809 (45.84%) |  |
| Race |  |  |  | <0.001 |
| Mexican American | 714 (16.18%) | 449 (16.95%) | 265 (15.01%) |  |
| Other Hispanic | 450 (10.19%) | 294 (11.10%) | 156 (8.84%) |  |
| Non-Hispanic White | 1788 (40.51%) | 1153 (43.53%) | 635 (35.98%) |  |
| Non-Hispanic Black | 1007 (22.81%) | 443 (16.72%) | 564 (31.95%) |  |
| Other Race | 455 (10.31%) | 310 (11.70%) | 145 (8.22%) |  |
| Education level |  |  |  | <0.001 |
| Less than high school | 1031 (23.36%) | 569 (21.48%) | 462 (26.18%) |  |
| High school or equivalent | 941 (21.32%) | 536 (20.23%) | 405 (22.95%) |  |
| College or above | 2442 (55.32%) | 1544 (58.29%) | 898 (50.88%) |  |
| Marital status |  |  |  | <0.001 |
| Married and a partner | 2896 (65.61%) | 1809 (68.29%) | 1087 (61.59%) |  |
| Never married | 556 (12.60%) | 351 (13.25%) | 205 (11.61%) |  |
| Widowed, divorced or separated | 962 (21.79%) | 489 (18.46%) | 473 (26.80%) |  |
| Poverty to income ratio |  |  |  | 0.001 |
| <1.3 | 1342 (30.40%) | 752 (28.39%) | 590 (33.43%) |  |
| 1.3-3.5 | 1508 (34.16%) | 921 (34.77%) | 587 (33.26%) |  |
| >3.5 | 1564 (35.43%) | 976 (36.84%) | 588 (33.31%) |  |
| Smoking status |  |  |  | <0.001 |
| Never | 2436 (55.19%) | 1512 (57.08%) | 924 (52.35%) |  |
| Current | 955 (21.64%) | 573 (21.63%) | 382 (21.64%) |  |
| Former | 1023 (23.18%) | 564 (21.29%) | 459 (26.01%) |  |
| Alcohol intake |  |  |  | <0.001 |
| Never | 2012 (45.58%) | 1233 (46.55%) | 779 (44.14%) |  |
| Current | 1663 (37.68%) | 1023 (38.62%) | 640 (36.26%) |  |
| Former | 739 (16.74%) | 393 (14.84%) | 346 (19.60%) |  |
| Body mass index |  |  |  | <0.001 |
| <25 | 1115 (25.26%) | 862 (32.54%) | 253 (14.33%) |  |
| 25-30 | 1514 (34.30%) | 950 (35.86%) | 564 (31.95%) |  |
| >30 | 1785 (40.44%) | 837 (31.60%) | 948 (53.71%) |  |
| Hyperlipidemia |  |  |  | <0.001 |
| No | 1199 (27.16%) | 845 (31.90%) | 354 (20.06%) |  |
| Yes | 3215 (72.84%) | 1804 (68.10%) | 1411 (79.94%) |  |
| Diabetes mellitus |  |  |  | <0.001 |
| No | 3646 (82.60%) | 2388 (90.15%) | 1258 (71.27%) |  |
| Yes | 768 (17.40%) | 261 (9.85%) | 507 (28.73%) |  |
| Cardiovascular disease |  |  |  | <0.001 |
| No | 4121 (93.36%) | 2587 (97.66%) | 1534 (86.91%) |  |
| Yes | 293 (6.64%) | 62 (2.34%) | 231 (13.09%) |  |
| Periodontitis |  |  |  | <0.001 |
| No | 2135 (48.37%) | 1431 (54.02%) | 704 (39.89%) |  |
| Yes | 2279 (51.63%) | 1218 (45.98%) | 1061 (60.11%) |  |

Table S3. α-diversity and hypertension risk after excluding participants with missing data

| **Exposure** | **Non-adjusted** | **AdjustI** | **AdjustII** |
| --- | --- | --- | --- |
|  | OR (95% CI) *P*-value | OR (95% CI) *P*-value | OR (95% CI)  *P*-value |
| Observed ASVs | 0.910 (0.856, 0.967) 0.00238 | 0.914 (0.853, 0.979) 0.00995 | 0.912 (0.846, 0.982) 0.01516 |
| Observed ASVs quartile |  |  |  |
| Q1 | 1 | 1 | 1 |
| Q2 | 0.754 (0.636, 0.893) 0.00110 | 0.807 (0.673, 0.968) 0.02113 | 0.823 (0.679, 0.998) 0.04760 |
| Q3 | 0.801 (0.676, 0.948) 0.01003 | 0.822 (0.684, 0.988) 0.03650 | 0.797 (0.655, 0.969) 0.02286 |
| Q4 | 0.745 (0.628, 0.882) 0.00067 | 0.776 (0.640, 0.941) 0.00978 | 0.773 (0.628, 0.951) 0.01507 |
| *P* for trend | 0.00246 | 0.01558 | 0.01504 |
| Faith’s phylogenetic diversity | 0.895 (0.841, 0.952) 0.00040 | 0.901 (0.840, 0.966) 0.00341 | 0.902 (0.837, 0.973) 0.00765 |
| Faith’s phylogenetic diversity quartile |  |  |  |
| Q1 | 1 | 1 | 1 |
| Q2 | 0.795 (0.671, 0.942) 0.00796 | 0.825 (0.688, 0.990) 0.03816 | 0.831 (0.686, 1.006) 0.05811 |
| Q3 | 0.771 (0.651, 0.914) 0.00268 | 0.768 (0.638, 0.924) 0.00517 | 0.749 (0.615, 0.913) 0.00419 |
| Q4 | 0.732 (0.618, 0.868) 0.00034 | 0.746 (0.616, 0.904) 0.00281 | 0.746 (0.606, 0.918) 0.00554 |
| *P* for trend | 0.00042 | 0.00206 | 0.00326 |
| Shannon-Weiner index | 0.969 (0.912, 1.029) 0.29909 | 0.960 (0.898, 1.026) 0.22743 | 0.961 (0.895, 1.032) 0.27140 |
| Shannon-Weiner index quartile |  |  |  |
| Q1 | 1 | 1 | 1 |
| Q2 | 0.979 (0.826, 1.161) 0.80822 | 0.982 (0.819, 1.179) 0.84698 | 1.033 (0.852, 1.252) 0.74246 |
| Q3 | 0.968 (0.817, 1.148) 0.70906 | 0.998 (0.831, 1.199) 0.98532 | 1.007 (0.830, 1.223) 0.94118 |
| Q4 | 0.941 (0.794, 1.116) 0.48694 | 0.921 (0.764, 1.111) 0.38811 | 0.929 (0.761, 1.135) 0.47258 |
| *P* for trend | 0.48353 | 0.45023 | 0.45469 |
| Inverse Simpson index | 1.035 (0.973, 1.100) 0.27203 | 1.005 (0.940, 1.073) 0.89331 | 1.004 (0.937, 1.077) 0.90450 |
| Inverse Simpson index quartile |  |  |  |
| Q1 | 1 | 1 | 1 |
| Q2 | 1.121 (0.946, 1.330) 0.18700 | 1.106 (0.921, 1.327) 0.28092 | 1.088 (0.897, 1.319) 0.39312 |
| Q3 | 0.994 (0.837, 1.180) 0.94385 | 0.968 (0.805, 1.163) 0.72480 | 0.958 (0.789, 1.162) 0.66265 |
| Q4 | 1.083 (0.913, 1.284) 0.36129 | 1.045 (0.870, 1.257) 0.63633 | 1.046 (0.861, 1.270) 0.65136 |
| *P* for trend | 0.67019 | 0.99552 | 0.9836 |

Non-adjusted: Crude model.

Adjust I: Adjusted for age, sex, race, education level, marital status, and poverty-to-income ratio.

Adjust II: Further adjusted for smoking status, alcohol intake, body mass index, hyperlipidemia, diabetes mellitus, cardiovascular disease, and periodontitis, in addition to covariates from Adjust I.

Table S4. Subgroup analysis and interaction test (missing data excluded)

| **Subgroups** | **ObservedASVs** | **Faith’sphylogeneticdiversity** | **Shannon-Weinerindex** | **InverseSimpsonindex** |
| --- | --- | --- | --- | --- |
| OR (95% CI) *P*-value | OR (95% CI)  *P*-value | OR (95% CI) *P*-value | OR (95% CI) *P*-value |
| Age |  |  |  |  |
| <50 | 0.898 (0.807, 1.000) 0.04963 | 0.870 (0.780, 0.970) 0.01217 | 0.963 (0.872, 1.065) 0.46316 | 1.028 (0.932, 1.135) 0.57909 |
| ≥50 | 0.916 (0.824, 1.018) 0.10265 | 0.927 (0.832, 1.032) 0.16633 | 0.946 (0.854, 1.049) 0.29108 | 0.966 (0.871, 1.071) 0.50682 |
| P for interaction | 0.723 | 0.373 | 0.865 | 0.413 |
| Sex |  |  |  |  |
| Male | 0.933 (0.846, 1.029) 0.16323 | 0.921 (0.833, 1.017) 0.10505 | 0.951 (0.863, 1.048) 0.31274 | 0.990 (0.896, 1.094) 0.84357 |
| Female | 0.893 (0.794, 1.005) 0.05945 | 0.888 (0.790, 0.998) 0.04633 | 0.970 (0.872, 1.078) 0.56834 | 1.010 (0.914, 1.115) 0.84874 |
| P for interaction | 0.566 | 0.658 | 0.807 | 0.792 |
| Smoking status |  |  |  |  |
| Never | 0.890 (0.800, 0.991) 0.03280 | 0.880 (0.790, 0.982) 0.02182 | 0.979 (0.889, 1.077) 0.65920 | 1.012 (0.927, 1.105) 0.79355 |
| Current | 0.947 (0.815, 1.099) 0.47310 | 0.990 (0.856, 1.144) 0.88712 | 0.968 (0.827, 1.133) 0.68853 | 1.022 (0.859, 1.216) 0.80509 |
| Former | 0.895 (0.768, 1.042) 0.15358 | 0.834 (0.714, 0.975) 0.02245 | 0.886 (0.763, 1.028) 0.11111 | 0.942 (0.801, 1.107) 0.46610 |
| P for interaction | 0.797 | 0.271 | 0.536 | 0.717 |
| Alcohol intake |  |  |  |  |
| Never | 0.850 (0.756, 0.956) 0.00663 | 0.835 (0.740, 0.943) 0.00351 | 0.917 (0.823, 1.021) 0.11392 | 0.976 (0.880, 1.083) 0.64704 |
| Current | 0.976 (0.869, 1.095) 0.67499 | 0.948 (0.846, 1.062) 0.35351 | 0.989 (0.880, 1.112) 0.85271 | 1.033 (0.917, 1.164) 0.59168 |
| Former | 0.896 (0.742, 1.083) 0.25738 | 0.941 (0.778, 1.136) 0.52522 | 0.996 (0.841, 1.179) 0.96136 | 1.009 (0.860, 1.185) 0.91033 |
| P for interaction | 0.255 | 0.289 | 0.557 | 0.763 |
| Body mass index |  |  |  |  |
| <25 | 0.922 (0.779, 1.091) 0.34535 | 0.909 (0.763, 1.082) 0.28221 | 0.947 (0.806, 1.113) 0.51190 | 0.999 (0.844, 1.183) 0.99339 |
| 25-30 | 0.820 (0.723, 0.931) 0.00219 | 0.824 (0.723, 0.938) 0.00352 | 0.869 (0.772, 0.979) 0.02134 | 0.946 (0.840, 1.067) 0.36747 |
| >30 | 0.986 (0.880, 1.104) 0.80512 | 0.968 (0.862, 1.086) 0.57653 | 1.026 (0.921, 1.142) 0.64338 | 1.026 (0.928, 1.134) 0.61954 |
| P for interaction | 0.106 | 0.193 | 0.129 | 0.592 |
| Hyperlipidemia |  |  |  |  |
| No | 0.934 (0.800, 1.090) 0.38612 | 0.905 (0.766, 1.070) 0.24362 | 0.983 (0.842, 1.147) 0.82377 | 1.028 (0.870, 1.215) 0.74446 |
| Yes | 0.903 (0.829, 0.983) 0.01868 | 0.899 (0.826, 0.979) 0.01385 | 0.956 (0.882, 1.035) 0.26657 | 1.001 (0.926, 1.081) 0.98538 |
| P for interaction | 0.704 | 0.608 | 0.754 | 0.773 |
| Diabetes mellitus |  |  |  |  |
| No | 0.937 (0.863, 1.017) 0.12159 | 0.936 (0.861, 1.016) 0.11482 | 0.969 (0.897, 1.047) 0.42511 | 1.009 (0.936, 1.088) 0.81670 |
| Yes | 0.780 (0.648, 0.938) 0.00834 | 0.746 (0.620, 0.899) 0.00204 | 0.879 (0.730, 1.058) 0.17286 | 0.925 (0.756, 1.132) 0.44980 |
| P for interaction | 0.096 | 0.516 | 0.376 | 0.433 |
| Cardiovascular disease |  |  |  |  |
| No | 0.913 (0.845, 0.986) 0.01978 | 0.902 (0.834, 0.976) 0.01022 | 0.970 (0.902, 1.043) 0.41042 | 1.016 (0.946, 1.092) 0.66293 |
| Yes | 0.909 (0.649, 1.272) 0.57700 | 0.884 (0.648, 1.205) 0.43504 | 0.825 (0.579, 1.177) 0.28894 | 0.766 (0.496, 1.183) 0.22930 |
| P for interaction | 0.941 | 0.912 | 0.417 | 0.220 |
| Periodontitis |  |  |  |  |
| No | 0.905 (0.795, 1.030) 0.12970 | 0.905 (0.801, 1.022) 0.10644 | 0.997 (0.892, 1.114) 0.95839 | 1.063 (0.960, 1.176) 0.23886 |
| Yes | 0.917 (0.836, 1.005) 0.06462 | 0.905 (0.820, 0.997) 0.04404 | 0.935 (0.851, 1.026) 0.15675 | 0.942 (0.850, 1.043) 0.24956 |
| P for interaction | 0.861 | 0.992 | 0.322 | 0.098 |

All results shown are based on the fully adjusted model (Adjust II).
